# Supplementary material for: Enhanced TfR1 Recognition of Myocardial Injury after Acute Myocardial Infarction with Cardiac Fibrosis via Pre-Degrading Excess Fibrotic Collagen
Source: MDPI journal article supplement (doi:10.3390/biology13040213), 2024-03-25

## Supplementary Materials for

**Enhanced TfR1 recognition of myocardial injury after acute myocardial infarction with cardiac fibrosis via pre-degrading excess fibrotic collagen**

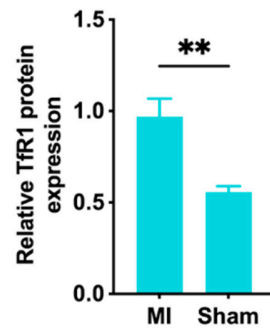

**Figure S1.** The western blot analysis of TfR1 in in MI and Sham group. (n=3, Student's *t* test. \*\*  $p < 0.01$ ).

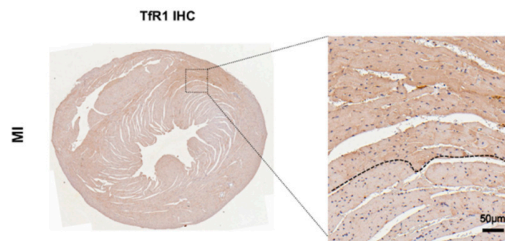

**Figure S2.** A high level of TfR1 expression was detected in the heart tissue of the MI mouse model by immunohistochemical staining. (Scale bar = 50  $\mu$ m).

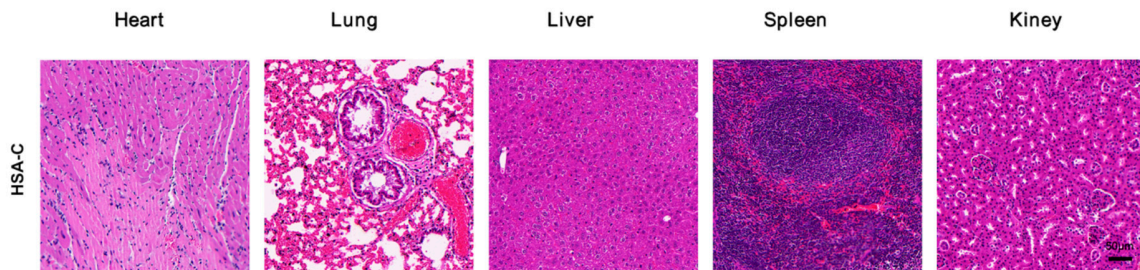

**Figure S3.** H&E staining of major organs in mouse which were pretreated with HSA-C. (Scale bar: 50  $\mu$ m).

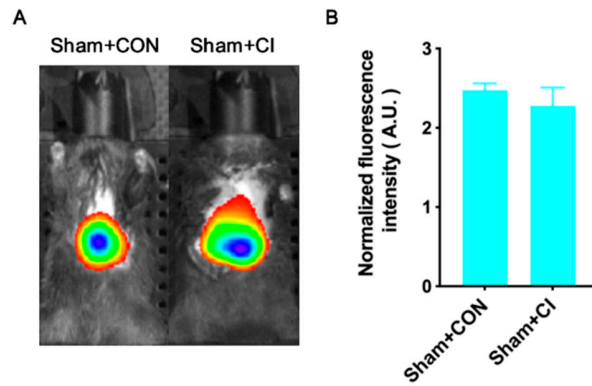

**Figure S4.** (A) The NIR fluorescence images of the MI mouse model at 48 h post-injection from different groups (Sham + CON *vs.* Sham + CI;  $n = 3$ ). (B) Quantitative comparison of normalized fluorescence intensities of different group (Sham + CON *vs.* Sham + CI;  $n = 3$ ).

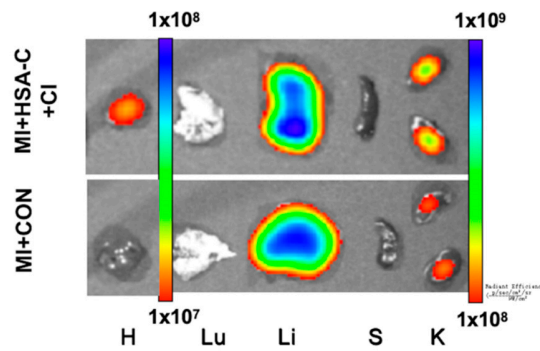

**Figure S5.** The *ex vivo* imaging for the heart and the other major organs of the MI mouse model (MI + CON *vs.* MI + HSA-C + CI), which were removed and captured 48 h after injection, were obtained using NIR fluorescence (H: Heart; Lu: Lung; Li: Liver; S: Spleen; K: Kidney).

**Figure S6.** Figure of Western Blot results: Comparison of TfR1 protein expression between myocardial infarction group and sham operation group.

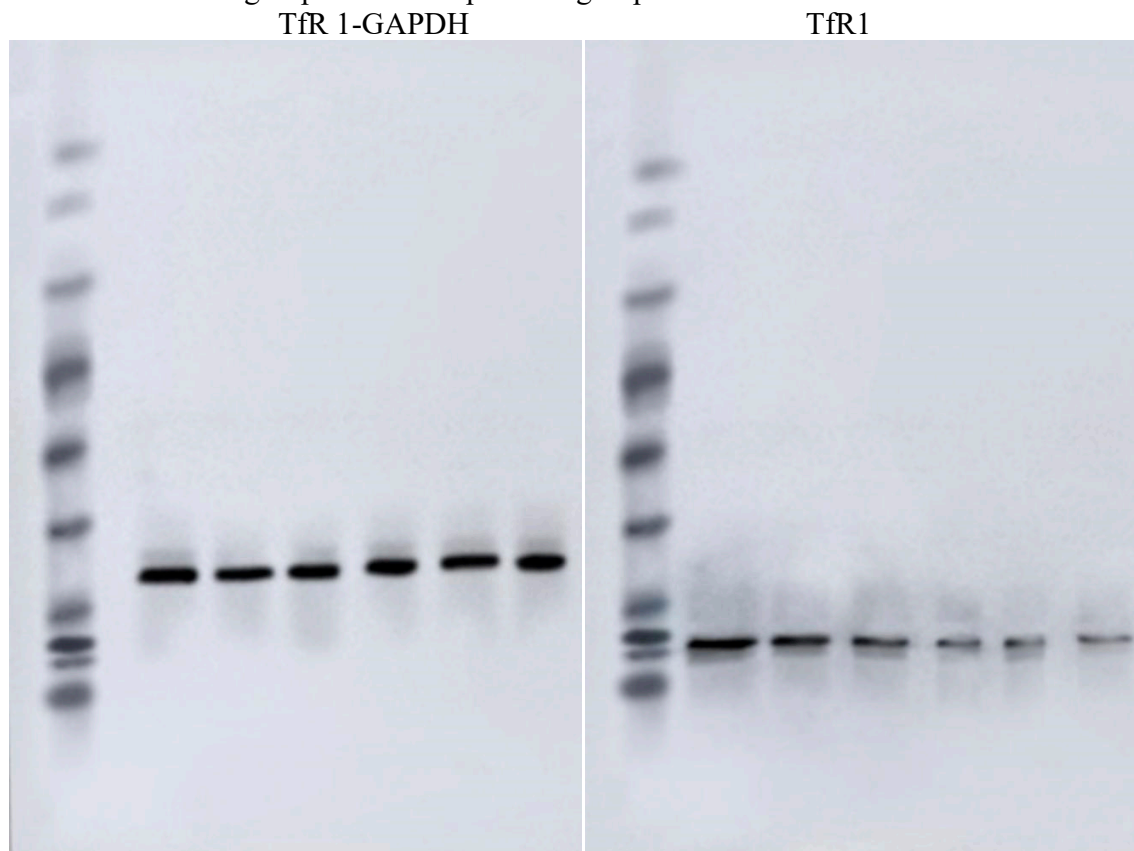

Supplement: s1 [file s1]
